# Supplementary material for: Beliefs about Lying and Spreading of Dishonesty: Undetected Lies and Their Constructive and Destructive Social Dynamics in Dice Experiments
Source: PLOS journal article supplement (doi:10.1371/journal.pone.0077878), 2013-11-13

Please estimate the reported payments of the other 9 participants of your group. For this purpose, enter the frequencies of claimed payments in the table below. Take into consideration that you have to estimate the distribution of a total of 108 die casts: because each of the 9 participants report 12 die casts, the total number of reported die casts is  $9 * 12 = 108$ . As you will have realized, the average frequency for each reported payment claim is 18 for a large number of die casts:  $1/6 * 12 \text{ casts} * 9 \text{ participants} = 18$ .

You receive additional money for the accuracy of your estimates: the better your estimates, the more money. You are paid separately for each of your 6 estimates, that is, you are paid for your estimate of the frequency of reported 0 CHF, 1 CHF, 2 CHF, 3 CHF, 4 CHF and 5 CHF. You are paid 0.80 CHF for a correct value. You are paid 0.75 CHF for a deviation of 1 from the correct value. For a deviation of 2, you are paid 0.60 CHF, for a deviation of 3, you are paid 0.35 CHF and you are paid nothing for larger deviations.

reported cast

frequency

| Auszahlung   | Häufigkeit         |
|--------------|--------------------|
| 0 CHF        | 17                 |
| 1 CHF        | 13                 |
| 2 CHF        | 22                 |
| 3 CHF        | 19                 |
| 4 CHF        | 26                 |
| 5 CHF        | 11                 |
| total number | Gesamtzahl:<br>108 |

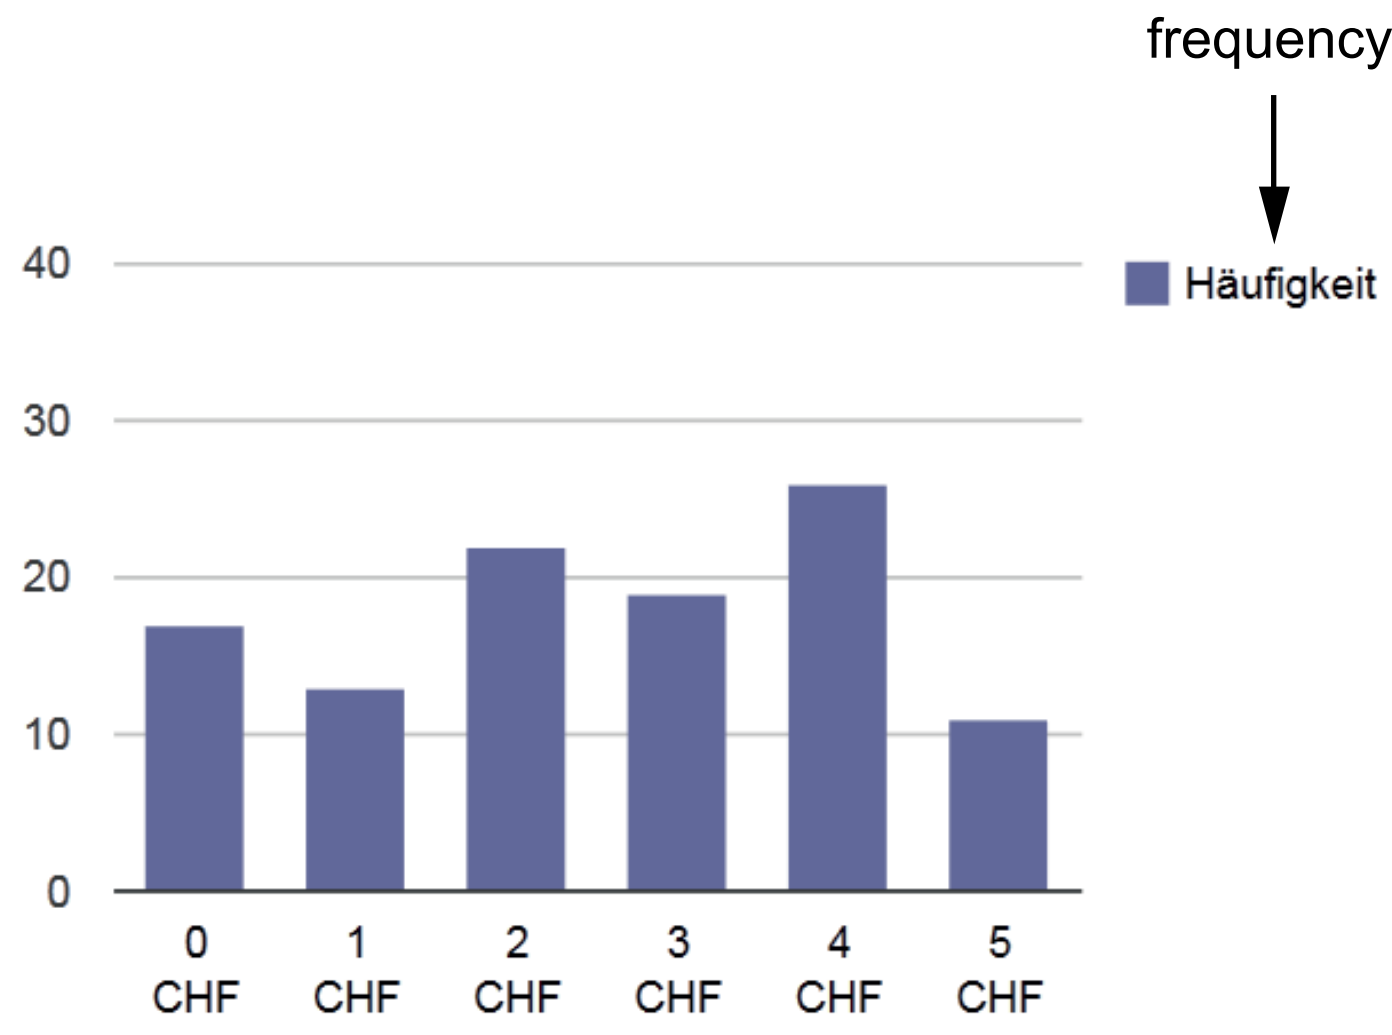

Supplement: S3 (10.1371/journal.pone.0077878.s003) [file journal.pone.0077878.s003]
