# Supplementary material for: Beliefs about Lying and Spreading of Dishonesty: Undetected Lies and Their Constructive and Destructive Social Dynamics in Dice Experiments
Source: PLOS journal article supplement (doi:10.1371/journal.pone.0077878), 2013-11-13
Supplement: S8 (10.1371/journal.pone.0077878.s008) [file journal.pone.0077878.s008]

|           | (1)<br>mean<br>(control belief) | (2)<br>mean<br>(control base) | (3)<br>fives<br>(control belief) | (4)<br>fives<br>(control base) |
|-----------|---------------------------------|-------------------------------|----------------------------------|--------------------------------|
| info      | 0.142<br>(1.06)                 | 0.0965<br>(0.71)              | 0.371<br>(0.69)                  | 0.146<br>(0.27)                |
| intercept | 3.282***<br>(34.08)             | 3.328***<br>(33.79)           | 4.104***<br>(10.85)              | 4.329***<br>(11.33)            |
| <i>N</i>  | 480                             | 480                           | 480                              | 480                            |

*t* statistics in parentheses, robust s.e. clustered for subjects, \*  $p < 0.05$ , \*\*  $p < 0.01$ , \*\*\*  $p < 0.001$
